# Supplementary material
Source: HighWire-hosted journal article supplement (https://bmjopen.bmj.com/content/9/5/e012671)
Supplement: inline-supplementary-material-3 [file inline-supplementary-material-3.pdf]

0%

Before starting the programme, we're asking you to answer some questions about your health, experiences and the financial cost of your health conditions. At the end of the programme, we will ask similar questions and then, again, 3 months later to see if there have been any changes since starting the programme.

Some people don't like sharing details of their income – we understand this. Why we ask about income is that it helps us to see what percentage of income people spend on their health (for example, if someone has lots of money, €500 a year is not such a big deal; but if someone is on a low income, €500 is a lot and makes life harder).

These initial questions may take anywhere between 20 and 60 minutes to complete, so please make sure you are positioned comfortably over the next while and try to enjoy sharing your information in this way. We need you to fill in every question – the website will let you know if you have missed one so you can fill it in and continue.

All your answers will be held confidentially and anonymously in the Centre for Pain Research, NUI Galway.

At this point, we ask that you indicate if you consent to being a part of this study, now that you have read the information sheet that we emailed you, and understand what is being asked of you.

If you consent to answering these questions and taking part, select yes and click Next to continue. This will bring you to the start of the questionnaire and allow you to begin answering questions.

If you do not consent, select no and click Next to continue. This will exit you from the questionnaire, and will prevent you from going any farther in the study.

If you have any questions, please do not hesitate to ask us directly via email, [painresearch@nuigalway.ie](mailto:painresearch@nuigalway.ie)

☐ Yes ☐ No

◀  
Previous

Next  
▶
